# Supplementary material for: A new synthesis of porphobilinogen analogues, inhibitors of hydroxymethylbilane synthaseElectronic supplementary information (ESI) available: Dixon plot. See http://www.rsc.org/suppdata/ob/b2/b209613g/
Source: Royal Society of Chemistry journal article supplement (doi:10.1039/b209613g), 2002-11-08
Supplement: b209613g.doc [file b209613g.doc]

**Fig. S1** Dixon plot for inhibition of HMBS by 6-methyl-PBG **19**.
The concentrations of PBG used were (a) 5 µM, (b) 10 µM, (c) 15 µM, and (d) 40 µM.
